# Supplementary material for: Comparative analysis of 7 short-read sequencing platforms using the Korean Reference Genome: MGI and Illumina sequencing benchmark for whole-genome sequencing
Source: PubMed Central journal article supplement (PMC7953489; doi:10.1093/gigascience/giab014), 2021-03-12
Supplement: giab014_giga-d-20-00072_revision_2.pdf [file giab014_giga-d-20-00072_revision_2.pdf]

# GigaScience

## Comparative analysis of seven short-read sequencing platforms using the Korean Reference Genome: MGI and Illumina sequencing benchmark for whole-genome sequencing

--Manuscript Draft--

|                                                      |                                                                                                                                                                                                                                                                                                                                                                                                                                                                                                                                                                                                                                                                                                                                                                                                                                                                                                                                                                                                                                                                                                                                                                                                                                                                                                                                                                                                                                                                                                                                                                  |                   |
|------------------------------------------------------|------------------------------------------------------------------------------------------------------------------------------------------------------------------------------------------------------------------------------------------------------------------------------------------------------------------------------------------------------------------------------------------------------------------------------------------------------------------------------------------------------------------------------------------------------------------------------------------------------------------------------------------------------------------------------------------------------------------------------------------------------------------------------------------------------------------------------------------------------------------------------------------------------------------------------------------------------------------------------------------------------------------------------------------------------------------------------------------------------------------------------------------------------------------------------------------------------------------------------------------------------------------------------------------------------------------------------------------------------------------------------------------------------------------------------------------------------------------------------------------------------------------------------------------------------------------|-------------------|
| <b>Manuscript Number:</b>                            | GIGA-D-20-00072R2                                                                                                                                                                                                                                                                                                                                                                                                                                                                                                                                                                                                                                                                                                                                                                                                                                                                                                                                                                                                                                                                                                                                                                                                                                                                                                                                                                                                                                                                                                                                                |                   |
| <b>Full Title:</b>                                   | Comparative analysis of seven short-read sequencing platforms using the Korean Reference Genome: MGI and Illumina sequencing benchmark for whole-genome sequencing                                                                                                                                                                                                                                                                                                                                                                                                                                                                                                                                                                                                                                                                                                                                                                                                                                                                                                                                                                                                                                                                                                                                                                                                                                                                                                                                                                                               |                   |
| <b>Article Type:</b>                                 | Data Note                                                                                                                                                                                                                                                                                                                                                                                                                                                                                                                                                                                                                                                                                                                                                                                                                                                                                                                                                                                                                                                                                                                                                                                                                                                                                                                                                                                                                                                                                                                                                        |                   |
| <b>Funding Information:</b>                          | Ulsan National Institute of Science and Technology (1.200047.01)                                                                                                                                                                                                                                                                                                                                                                                                                                                                                                                                                                                                                                                                                                                                                                                                                                                                                                                                                                                                                                                                                                                                                                                                                                                                                                                                                                                                                                                                                                 | Dr. Jong Hwa Bhak |
|                                                      | Ministry of Trade, Industry and Energy (20010587)                                                                                                                                                                                                                                                                                                                                                                                                                                                                                                                                                                                                                                                                                                                                                                                                                                                                                                                                                                                                                                                                                                                                                                                                                                                                                                                                                                                                                                                                                                                | Dr. Jong Hwa Bhak |
| <b>Abstract:</b>                                     | <p>Background: DNBSEQ-T7 is a new whole-genome sequencer developed by Complete Genomics and MGI utilizing DNA nanoball and combinatorial probe anchor synthesis technologies to generate short reads at a very large scale – up to 60 human genomes per day. However, it has not been objectively and systematically compared against Illumina short-read sequencers.</p> <p>Findings: By using the same KOREF sample, the Korean Reference Genome, we have compared seven sequencing platforms including BGISEQ-500, DNBSEQ-T7, HiSeq2000, HiSeq2500, HiSeq4000, HiSeqX10, and NovaSeq6000. We measured sequencing quality by comparing sequencing statistics (base quality, duplication rate, and random error rate), mapping statistics (mapping rate, depth distribution, and %GC coverage), and variant statistics (transition/transversion ratio, dbSNP annotation rate, and concordance rate with SNP genotyping chip) across the seven sequencing platforms. We found that MGI platforms showed a higher concordance rate for SNP genotyping than HiSeq2000 and HiSeq4000. The similarity matrix of variant calls confirmed that the two MGI platforms have the most similar characteristics to the HiSeq2500 platform.</p> <p>Conclusions: Overall, MGI and Illumina sequencing platforms showed comparable levels of sequencing quality, uniformity of coverage, %GC coverage, and variant accuracy, thus we conclude that the MGI platforms can be used for a wide range of genomics research fields at a lower cost than the Illumina platforms.</p> |                   |
| <b>Corresponding Author:</b>                         | Jong Hwa Bhak, Ph.D.<br>UNIST<br>Ulsan, Ulsan KOREA, REPUBLIC OF                                                                                                                                                                                                                                                                                                                                                                                                                                                                                                                                                                                                                                                                                                                                                                                                                                                                                                                                                                                                                                                                                                                                                                                                                                                                                                                                                                                                                                                                                                 |                   |
| <b>Corresponding Author Secondary Information:</b>   |                                                                                                                                                                                                                                                                                                                                                                                                                                                                                                                                                                                                                                                                                                                                                                                                                                                                                                                                                                                                                                                                                                                                                                                                                                                                                                                                                                                                                                                                                                                                                                  |                   |
| <b>Corresponding Author's Institution:</b>           | UNIST                                                                                                                                                                                                                                                                                                                                                                                                                                                                                                                                                                                                                                                                                                                                                                                                                                                                                                                                                                                                                                                                                                                                                                                                                                                                                                                                                                                                                                                                                                                                                            |                   |
| <b>Corresponding Author's Secondary Institution:</b> |                                                                                                                                                                                                                                                                                                                                                                                                                                                                                                                                                                                                                                                                                                                                                                                                                                                                                                                                                                                                                                                                                                                                                                                                                                                                                                                                                                                                                                                                                                                                                                  |                   |
| <b>First Author:</b>                                 | Hak-Min Kim, Ph.D.                                                                                                                                                                                                                                                                                                                                                                                                                                                                                                                                                                                                                                                                                                                                                                                                                                                                                                                                                                                                                                                                                                                                                                                                                                                                                                                                                                                                                                                                                                                                               |                   |
| <b>First Author Secondary Information:</b>           |                                                                                                                                                                                                                                                                                                                                                                                                                                                                                                                                                                                                                                                                                                                                                                                                                                                                                                                                                                                                                                                                                                                                                                                                                                                                                                                                                                                                                                                                                                                                                                  |                   |
| <b>Order of Authors:</b>                             | Hak-Min Kim, Ph.D.                                                                                                                                                                                                                                                                                                                                                                                                                                                                                                                                                                                                                                                                                                                                                                                                                                                                                                                                                                                                                                                                                                                                                                                                                                                                                                                                                                                                                                                                                                                                               |                   |
|                                                      | Sungwon Jeon                                                                                                                                                                                                                                                                                                                                                                                                                                                                                                                                                                                                                                                                                                                                                                                                                                                                                                                                                                                                                                                                                                                                                                                                                                                                                                                                                                                                                                                                                                                                                     |                   |
|                                                      | Oksung Chung                                                                                                                                                                                                                                                                                                                                                                                                                                                                                                                                                                                                                                                                                                                                                                                                                                                                                                                                                                                                                                                                                                                                                                                                                                                                                                                                                                                                                                                                                                                                                     |                   |
|                                                      | Je Hoon Jun                                                                                                                                                                                                                                                                                                                                                                                                                                                                                                                                                                                                                                                                                                                                                                                                                                                                                                                                                                                                                                                                                                                                                                                                                                                                                                                                                                                                                                                                                                                                                      |                   |
|                                                      | Hui-Su Kim, Ph.D.                                                                                                                                                                                                                                                                                                                                                                                                                                                                                                                                                                                                                                                                                                                                                                                                                                                                                                                                                                                                                                                                                                                                                                                                                                                                                                                                                                                                                                                                                                                                                |                   |
|                                                      | Asta Blazyte                                                                                                                                                                                                                                                                                                                                                                                                                                                                                                                                                                                                                                                                                                                                                                                                                                                                                                                                                                                                                                                                                                                                                                                                                                                                                                                                                                                                                                                                                                                                                     |                   |

|                                                                               |                                                                                                                                                                                                                                                                                                                                                                                                                                                                                                                                                                                                                                                                                                                                                                                                                                                                                                                                                                                                                                                                                                                                                                                                                                                                                                                                                                                                                                                                                                                                                                                                                                                                                                                                                                                                                                                                                                                                                                                                                                                                                                                                                                                                                                                                                                                                                                                                                                                                                                                                                                                                                                                                                                                                                                                                                                                                                                                                                                                                                                                                                                                                                                                                                                                                                                                                                                                                                     |
|-------------------------------------------------------------------------------|---------------------------------------------------------------------------------------------------------------------------------------------------------------------------------------------------------------------------------------------------------------------------------------------------------------------------------------------------------------------------------------------------------------------------------------------------------------------------------------------------------------------------------------------------------------------------------------------------------------------------------------------------------------------------------------------------------------------------------------------------------------------------------------------------------------------------------------------------------------------------------------------------------------------------------------------------------------------------------------------------------------------------------------------------------------------------------------------------------------------------------------------------------------------------------------------------------------------------------------------------------------------------------------------------------------------------------------------------------------------------------------------------------------------------------------------------------------------------------------------------------------------------------------------------------------------------------------------------------------------------------------------------------------------------------------------------------------------------------------------------------------------------------------------------------------------------------------------------------------------------------------------------------------------------------------------------------------------------------------------------------------------------------------------------------------------------------------------------------------------------------------------------------------------------------------------------------------------------------------------------------------------------------------------------------------------------------------------------------------------------------------------------------------------------------------------------------------------------------------------------------------------------------------------------------------------------------------------------------------------------------------------------------------------------------------------------------------------------------------------------------------------------------------------------------------------------------------------------------------------------------------------------------------------------------------------------------------------------------------------------------------------------------------------------------------------------------------------------------------------------------------------------------------------------------------------------------------------------------------------------------------------------------------------------------------------------------------------------------------------------------------------------------------------|
|                                                                               | Hwang-Yeol Lee                                                                                                                                                                                                                                                                                                                                                                                                                                                                                                                                                                                                                                                                                                                                                                                                                                                                                                                                                                                                                                                                                                                                                                                                                                                                                                                                                                                                                                                                                                                                                                                                                                                                                                                                                                                                                                                                                                                                                                                                                                                                                                                                                                                                                                                                                                                                                                                                                                                                                                                                                                                                                                                                                                                                                                                                                                                                                                                                                                                                                                                                                                                                                                                                                                                                                                                                                                                                      |
|                                                                               | Youngseok Yu                                                                                                                                                                                                                                                                                                                                                                                                                                                                                                                                                                                                                                                                                                                                                                                                                                                                                                                                                                                                                                                                                                                                                                                                                                                                                                                                                                                                                                                                                                                                                                                                                                                                                                                                                                                                                                                                                                                                                                                                                                                                                                                                                                                                                                                                                                                                                                                                                                                                                                                                                                                                                                                                                                                                                                                                                                                                                                                                                                                                                                                                                                                                                                                                                                                                                                                                                                                                        |
|                                                                               | Yun Sung Cho, Ph.D.                                                                                                                                                                                                                                                                                                                                                                                                                                                                                                                                                                                                                                                                                                                                                                                                                                                                                                                                                                                                                                                                                                                                                                                                                                                                                                                                                                                                                                                                                                                                                                                                                                                                                                                                                                                                                                                                                                                                                                                                                                                                                                                                                                                                                                                                                                                                                                                                                                                                                                                                                                                                                                                                                                                                                                                                                                                                                                                                                                                                                                                                                                                                                                                                                                                                                                                                                                                                 |
|                                                                               | Dan M. Bolser, Ph.D.                                                                                                                                                                                                                                                                                                                                                                                                                                                                                                                                                                                                                                                                                                                                                                                                                                                                                                                                                                                                                                                                                                                                                                                                                                                                                                                                                                                                                                                                                                                                                                                                                                                                                                                                                                                                                                                                                                                                                                                                                                                                                                                                                                                                                                                                                                                                                                                                                                                                                                                                                                                                                                                                                                                                                                                                                                                                                                                                                                                                                                                                                                                                                                                                                                                                                                                                                                                                |
|                                                                               | Jong Hwa Bhak, Ph.D.                                                                                                                                                                                                                                                                                                                                                                                                                                                                                                                                                                                                                                                                                                                                                                                                                                                                                                                                                                                                                                                                                                                                                                                                                                                                                                                                                                                                                                                                                                                                                                                                                                                                                                                                                                                                                                                                                                                                                                                                                                                                                                                                                                                                                                                                                                                                                                                                                                                                                                                                                                                                                                                                                                                                                                                                                                                                                                                                                                                                                                                                                                                                                                                                                                                                                                                                                                                                |
| <b>Order of Authors Secondary Information:</b>                                |                                                                                                                                                                                                                                                                                                                                                                                                                                                                                                                                                                                                                                                                                                                                                                                                                                                                                                                                                                                                                                                                                                                                                                                                                                                                                                                                                                                                                                                                                                                                                                                                                                                                                                                                                                                                                                                                                                                                                                                                                                                                                                                                                                                                                                                                                                                                                                                                                                                                                                                                                                                                                                                                                                                                                                                                                                                                                                                                                                                                                                                                                                                                                                                                                                                                                                                                                                                                                     |
| <b>Response to Reviewers:</b>                                                 | <p>Reviewer reports:</p> <p>Reviewer #1: Much improved manuscript. I only have minor comments:<br/> 1) The examination of platform-specific covered region between MGI and Illumina platforms is still problematic. A single fold change threshold is unreliable. The authors should further make statistical test to identify platform-specific covered regions.<br/> ==&gt; As pointed out by the reviewer, we re-analyzed the platform-specific covered region between MGI and Illumina platforms. We now use statistical test (edgeR method for group comparison followed by Benjamini-Hochberg correction for p-value adjustment) rather than the single fold change threshold to identify the platform-specific covered region. As a result, the number of platform-specific covered regions of MGI platform increased from 1,436 to 1,778, and in the case of Illumina, increased from 2,881 to 2,967. We updated the manuscript and supplementary figure and table (See Results section lines 143-145; Figure S10 and Table S6).</p> <p>2) Since the standard variant data set is not available, I think it is necessary to discuss the potential reason of the platform-specific SNVs and the singletons. Whether their distribution is associated with platform-specific covered regions or other reasons associated with low sequencing quality?<br/> ==&gt; We speculate that repetitive regions with low mapping tendency were the one of the reasons for the platform-specific SNVs and singletons.<br/> To figure out the potential reason of the platform-specific SNVs and the singletons, we compared these SNVs to platform-specific covered regions. First, we compared platform-specific SNVs to platform-specific covered regions. We found only 2.8% of Illumina platform-specific SNVs and 1.6% of MGI platform-specific SNVs are included in the platform specific covered region (Table S8). In addition, most of the platform-specific SNVs were located in a sufficient depth region (&gt;10x), and about 74% of platform-specific SNVs were included in the repeat region (Table S9).<br/> The singleton also showed a similar pattern to platform-specific SNVs. There were very few overlapping positions between the singleton variants and the platform-specific covered region (0.5% on average, Table S10), and most of the singletons were located in the relatively high depth region (&gt;10x). About 74% of singletons were included in the repeat region (Table S9).<br/> We updated these results to the manuscript (See Results section lines 179-194).</p> <p>Reviewer #2: The authors addressed my and other reviewers's comments however many of the changes were quite minimal. It is suggested they can put the additional test in the main text and clarify all those limitations (not simple mentioned) in their study in the discussion section. For example, the high duplicate ratio in MGISEQ-T7 and a single individual was used.<br/> ==&gt; Thanks for the comment. We now added additional result for platform-specific SNVs, singleton, and high duplicate ratio of MGISEQ-T7 platform in the manuscript (See Results section lines 134-135; Tables S4, S8, S9, and S10). Furthermore, we added a list of sequencing platform comparison studies using single individual in the discussion section (See Discussion section lines 221-228; Table S14).</p> |
| <b>Additional Information:</b>                                                |                                                                                                                                                                                                                                                                                                                                                                                                                                                                                                                                                                                                                                                                                                                                                                                                                                                                                                                                                                                                                                                                                                                                                                                                                                                                                                                                                                                                                                                                                                                                                                                                                                                                                                                                                                                                                                                                                                                                                                                                                                                                                                                                                                                                                                                                                                                                                                                                                                                                                                                                                                                                                                                                                                                                                                                                                                                                                                                                                                                                                                                                                                                                                                                                                                                                                                                                                                                                                     |
| <b>Question</b>                                                               | <b>Response</b>                                                                                                                                                                                                                                                                                                                                                                                                                                                                                                                                                                                                                                                                                                                                                                                                                                                                                                                                                                                                                                                                                                                                                                                                                                                                                                                                                                                                                                                                                                                                                                                                                                                                                                                                                                                                                                                                                                                                                                                                                                                                                                                                                                                                                                                                                                                                                                                                                                                                                                                                                                                                                                                                                                                                                                                                                                                                                                                                                                                                                                                                                                                                                                                                                                                                                                                                                                                                     |
| Are you submitting this manuscript to a special series or article collection? | No                                                                                                                                                                                                                                                                                                                                                                                                                                                                                                                                                                                                                                                                                                                                                                                                                                                                                                                                                                                                                                                                                                                                                                                                                                                                                                                                                                                                                                                                                                                                                                                                                                                                                                                                                                                                                                                                                                                                                                                                                                                                                                                                                                                                                                                                                                                                                                                                                                                                                                                                                                                                                                                                                                                                                                                                                                                                                                                                                                                                                                                                                                                                                                                                                                                                                                                                                                                                                  |

|                                                                                                                                                                                                                                                                                                                                                                                                                                                                                                                                                         |            |
|---------------------------------------------------------------------------------------------------------------------------------------------------------------------------------------------------------------------------------------------------------------------------------------------------------------------------------------------------------------------------------------------------------------------------------------------------------------------------------------------------------------------------------------------------------|------------|
| <p><b>Experimental design and statistics</b></p> <p>Full details of the experimental design and statistical methods used should be given in the Methods section, as detailed in our <a href="#">Minimum Standards Reporting Checklist</a>. Information essential to interpreting the data presented should be made available in the figure legends.</p> <p>Have you included all the information requested in your manuscript?</p>                                                                                                                      | <p>Yes</p> |
| <p><b>Resources</b></p> <p>A description of all resources used, including antibodies, cell lines, animals and software tools, with enough information to allow them to be uniquely identified, should be included in the Methods section. Authors are strongly encouraged to cite <a href="#">Research Resource Identifiers</a> (RRIDs) for antibodies, model organisms and tools, where possible.</p> <p>Have you included the information requested as detailed in our <a href="#">Minimum Standards Reporting Checklist</a>?</p>                     | <p>Yes</p> |
| <p><b>Availability of data and materials</b></p> <p>All datasets and code on which the conclusions of the paper rely must be either included in your submission or deposited in <a href="#">publicly available repositories</a> (where available and ethically appropriate), referencing such data using a unique identifier in the references and in the “Availability of Data and Materials” section of your manuscript.</p> <p>Have you have met the above requirement as detailed in our <a href="#">Minimum Standards Reporting Checklist</a>?</p> | <p>Yes</p> |

1 **Comparative analysis of seven short-read sequencing platforms**  
2 **using the Korean Reference Genome: MGI and Illumina**  
3 **sequencing benchmark for whole-genome sequencing**

4 **Hak-Min Kim<sup>1</sup>, Sungwon Jeon<sup>2,3</sup>, Oksung Chung<sup>1</sup>, Je Hoon Jun<sup>1</sup>, Hui-Su Kim<sup>2</sup>, Asta**  
5 **Blazyte<sup>2,3</sup>, Hwang-Yeol Lee<sup>1</sup>, Youngseok Yu<sup>1</sup>, Yun Sung Cho<sup>1</sup>, Dan M. Bolser<sup>4\*</sup>, and Jong**  
6 **Bhak<sup>1,2,3,4,5\*</sup>**

7 <sup>1</sup>Clinomics, Ulsan National Institute of Science and Technology, Ulsan 44919, Republic of  
8 Korea

9 <sup>2</sup>Korean Genomics Center (KOGIC), Ulsan National Institute of Science and Technology,  
10 Ulsan 44919, Republic of Korea

11 <sup>3</sup>Department of Biomedical Engineering, School of Life Sciences, Ulsan National Institute of  
12 Science and Technology, Ulsan 44919, Republic of Korea

13 <sup>4</sup>Geromics Ltd, 23 King Street, Cambridge, CB1 1AH, UK

14 <sup>5</sup>Personal Genomics Institute (PGI), Genome Research Foundation, Osong 28160, Republic of  
15 Korea

16 \*Corresponding authors

17 Dan M. Bolser, dan@geromics.co.uk; Jong Bhak, jongsbhak@genomics.org, +82-52-217-5329

18 Email address:

19 H.M.K.: howmany2@gmail.com

20 S.J.: jsw0061@gmail.com  
21 O.C.: okokookk219@gmail.com  
22 J.H.J.: junjh0701@gmail.com  
23 H.S.K.: hskim3824@gmail.com  
24 A.B.: blazyte.asta@gmail.com  
25 H.Y.L.: hyeol911@gmail.com  
26 Y.Y.: yung7449@gmail.com  
27 Y.S.C.: joys0406@gmail.com  
28 D.M.B.: dan@geromics.co.uk  
29 J.B.: jongbhak@genomics.org

30 **ORCID:**

31 **Hak-Min Kim[0000-0001-6066-2469]; Sungwon Jeon[0000-0002-2729-9087]; Oksung C**  
32 **hung[0000-0001-5003-4071]; Je Hoon Jun[0000-0002-6558-1091]; Hui-Su Kim[0000-000**  
33 **3-2277-638X]; Asta Blazyte[0000-0001-7309-1482]; Hwang-Yeol Lee[0000-0002-0981-18**  
34 **92]; Youngseok Yu[0000-0002-7313-9519]; Yun Sung Cho[0000-0003-4490-8769]; Dan**  
35 **M. Bolser[0000-0002-3991-0859]; Jong Bhak[0000-0002-4228-1299]**

36

37 **Abstract**

38 **Background:** DNBSEQ-T7 is a new whole-genome sequencer developed by Complete  
39 Genomics and MGI utilizing DNA nanoball and combinatorial probe anchor synthesis

40 technologies to generate short reads at a very large scale – up to 60 human genomes per day.  
41 However, it has not been objectively and systematically compared against Illumina short-read  
42 sequencers. **Findings:** By using the same KOREF sample, the Korean Reference Genome, we  
43 have compared seven sequencing platforms including BGISEQ-500, DNBSEQ-T7, HiSeq2000,  
44 HiSeq2500, HiSeq4000, HiSeqX10, and NovaSeq6000. We measured sequencing quality by  
45 comparing sequencing statistics (base quality, duplication rate, and random error rate),  
46 mapping statistics (mapping rate, depth distribution, and %GC coverage), and variant statistics  
47 (transition/transversion ratio, dbSNP annotation rate, and concordance rate with SNP  
48 genotyping chip) across the seven sequencing platforms. We found that MGI platforms showed  
49 a higher concordance rate for SNP genotyping than HiSeq2000 and HiSeq4000. The similarity  
50 matrix of variant calls confirmed that the two MGI platforms have the most similar  
51 characteristics to the HiSeq2500 platform. **Conclusions:** Overall, MGI and Illumina  
52 sequencing platforms showed comparable levels of sequencing quality, uniformity of  
53 coverage, %GC coverage, and variant accuracy, thus we conclude that the MGI platforms can  
54 be used for a wide range of genomics research fields at a lower cost than the Illumina platforms.  
55 **Keywords:** DNBSEQ-T7; whole-genome sequencing; sequencing platform comparison;

56

## 57 **Introduction**

58 Recently, due to the rapid technological advancement, the second- and third-generation  
59 sequencing platforms can produce a large amount of short- or long-read data at relatively low  
60 cost [1]. Depending on the application, these sequencers offer several distinct advantages.  
61 Short-read based second-generation sequencing can be used to efficiently and accurately  
62 identify genomic variations. Long-read based third-generation sequencing can be used to

63 identify structural variations and build high quality *de novo* genome assemblies [2]. Short-read  
64 sequencing technologies are routinely used in large-scale population analyses and molecular  
65 diagnostic applications because of the low cost and high accuracy [3]. The recent platforms  
66 from Illumina are the HiSeqX10 and NovaSeq6000 short-read sequencers. A competing  
67 sequencer developed by Complete Genomics and MGI Tech is the DNBSEQ-T7 (formerly  
68 known as MGISEQ-T7). DNBSEQ-T7 is a new sequencing platform following on from  
69 BGISEQ-500, that uses DNA nanoball and combinatorial probe anchor synthesis to generate  
70 short reads at a very large scale [4].

71 In 2017 the first paper was published showing similar accuracy of SNP detection for  
72 the BGISEQ-500 platform compared to the HiSeq2500 [5]. While the overall quality of the  
73 data generated by BGISEQ-500 was shown to be of high quality, some of its characteristics  
74 showed lower quality compared to Illumina HiSeq2500. In addition, the comparison results for  
75 DNA, RNA, and metagenome sequencing of the Illumina and the MGI platforms have been  
76 reported [6-8]. Furthermore, coronavirus analysis studies using an MGI platform have been  
77 reported in 2020 [9, 10]. Despite this, to date no study has compared Illumina platforms with  
78 DNBSEQ-T7 for whole-genome sequencing (WGS). In the present study, we compared seven  
79 short-read based sequencers; two MGI platforms (BGISEQ-500 and DNBSEQ-T7) and five  
80 Illumina platforms (HiSeq2000, HiSeq2500, HiSeq4000, HiSeqX10, and NovaSeq6000)  
81 (Table 1). We focused on how similar the two sets of platforms are rather than the accuracy of  
82 each sequencer, by comparing variants, platform-specific covered regions as well as the  
83 concordance rate to SNP genotyping chip.

84

## 85 **Results**

### 86 **Sequencing data summary**

87 We analyzed and benchmarked the whole-genome sequencing data quality generated by the  
88 seven sequencers using the KOREF (the Korean Reference Genome) [11] DNA. Due to the  
89 sequential release and distribution of the sequencers, KOREF sequencing has been carried out  
90 in the nine years following the projects launch in 2010. Therefore, the blood samples, library  
91 construction, and sequencing conditions were not the same, although all the samples were from  
92 one individual. The Illumina platform data used here were from 2012 to 2019, while the MGI  
93 platform data were from 2017 and 2019. With the read length differing depending on the  
94 platform. The Illumina HiSeq2000 had the shortest read length of 90 bp paired-end (PE) and  
95 the HiSeq4000, HiSeqX10, and NovaSeq6000 had 151 bp PE. The read length of the  
96 HiSeq2500 is 101 bp PE and that of the BGISEQ-500 and DNBSEQ-T7 is 100 bp PE.  
97 Additionally there is a difference in the amount of data produced, so we therefore randomly  
98 selected 35× coverage sequencing data for HiSeq2500 and NovaSeq6000 which have  
99 equivalent amounts of sequencing data matching that of BGISEQ-500 and HiSeqX10  
100 platforms. HiSeq2000, HiSeq4000, and DNBSEQ-T7 had roughly 30× coverage.

101

## 102 **Assessment of base quality and sequencing error in raw reads**

103 Base quality is an important factor in evaluating the performance of sequencing platforms. We  
104 analyzed the sequencing quality by identifying low-quality reads. First, we investigated the  
105 base quality distribution of raw reads with the FastQC (FastQC, RRID:SCR\_014583) [12]. All  
106 seven sequencing platforms showed that the quality of each nucleotide gradually decreased  
107 towards the end of a read (Fig. S1). The quality value of the HiSeq4000 and HiSeqX10 reads  
108 showed a tendency to decrease rapidly towards the end of the read. We defined low-quality  
109 reads as those that had more than 30% of bases with a sequencing quality score lower than 20.  
110 The fraction of low-quality reads ranged from 2.8% to 18.3% across the seven sequencing



111 platforms (Fig. S2 and Table S1). Based on the filtering criteria, the newest platforms,  
112 NovaSeq6000 and DNBSEQ-T7, showed the lowest percentage of low-quality reads (2.8% and  
113 4.2%, respectively).

114 We analyzed the frequency of random sequencing errors (ambiguous base, N), which  
115 is also an important factor to evaluate the quality of the sequencing platform. We found that  
116 the HiSeq2000, HiSeq4000, and HiSeqX10 showed a high random error ratio in certain  
117 sequencing cycles (Fig. S3 and Table S2). Furthermore, in the case of HiSeq2000, the random  
118 error tended to increase gradually after each sequencing cycle. We also investigated the  
119 sequencing error using *K*-mer analysis. Most erroneous *K*-mers caused by sequencing error  
120 appeared at very low frequency and form a sharp left-side peak [13, 14]. Distribution of *K*-mer  
121 frequencies showed similar distributions between the platforms (Fig. 1). However, there was a  
122 difference in the proportion of low-frequency *K*-mer ( $\leq 3$  *K*-mer depth), which was considered  
123 as putative sequencing errors (Table S3). The NovaSeq6000 showed the lowest amount of  
124 erroneous *K*-mer (3.91%), while the HiSeq4000 contained the highest amount of erroneous *K*-  
125 mer (13.91%) among the seven sequencing platforms. The BGISEQ-500 and DNBSEQ-T7  
126 showed a moderate level of erroneous *K*-mer (7.72% and 6.39%, respectively).

127 We examined the duplication rate and adapter contamination in the seven sequencing  
128 platforms (Table S2). We examined the exact duplicates, which are identical sequence copies,  
129 from raw sequence data. The HiSeq2000 and DNBSEQ-T7 showed the highest duplicate ratio  
130 (8.71% in HiSeq2000 and 3.04% in DNBSEQ-T7). The HiSeq4000, HiSeqX10 and  
131 NovaSeq6000 showed higher adapter contamination rates than other platforms, probably due  
132 to longer sequence length (151 bp). However, duplicates and adapter contamination may be  
133 more affected by the process of sample preparation than by the sequencing instrument.

134

## 135 **Genome coverage and sequencing uniformity**

136 In order to assess genomic coverage and sequencing uniformity, we aligned quality-filtered  
137 reads to the human reference genome (GRCh38). All seven sequencing platforms showed a  
138 mapping rate of more than 99.98% and genome coverage of more than 99.6% ( $\geq 1\times$ ; Table 2).  
139 We observed a higher duplicate mapping rate in the HiSeq2000 (15.35%) and DNBSEQ-T7  
140 (8.77%) than the other platforms and the same pattern as the duplication rates of raw reads (see  
141 Table S2). Additionally, it was also observed that duplication rates of other DNBSEQ-T7 data  
142 were also high, which were generated by the same run with the KOREF data (Table S4). The  
143 insert-size for paired-end libraries corresponds to the targeted fragment size for each platform  
144 (Fig. S4). It has been reported that the depth of coverage is often far from evenly distributed  
145 across the sequenced genome [15]. To assess the sequencing uniformity, we analyzed the  
146 distribution of mapping depth for all chromosomes (Fig. S5). All seven platforms showed a  
147 similar pattern of depth distribution, but interestingly, we found that the depth near the  
148 centromere regions was lower exclusively in the HiSeq4000 (Figs. S6-S9). We speculate that  
149 this may have been due to a bias in the library preparation step on the HiSeq4000 platform.

150 In order to examine the platform-specific covered region of MGI and Illumina  
151 platforms, we defined a platform-specific covered region that had significantly different depths  
152 based on the 100 bp non-overlapping windows and statistical test [16]. Prior to examining the  
153 platform-specific covered regions, mapped reads were down-sampled for all platforms to  $24\times$   
154 coverage, which is the minimum coverage among the platforms, for a fair comparison. (Table  
155 S5). We found 178 Kb and 297 Kb of the platform-specific covered regions from MGI and  
156 Illumina platforms, respectively (Table S6). A total of 168 and 373 genes were overlapped in  
157 MGI and Illumina specific covered regions, respectively, and most of them were intronic.  
158 Interestingly, however, the platform-specific covered regions showed a significantly different

159 distribution of GC ratios between the MGI and Illumina platforms (Fig. S10). The MGI  
160 platforms tend to cover regions relatively high in GC content (Wilcoxon rank-sum test,  $P =$   
161  $2.37 \times 10^{-133}$ ). Nevertheless, it is obvious that platform-specific covered regions for Illumina  
162 platforms are slightly longer than those of the MGI platforms, and these regions were not  
163 sufficiently covered by the MGI platforms.

164 Biases in PCR amplification create uneven genomic representation in classical  
165 Illumina libraries [17, 18] as PCR is sensitive to extreme GC-content variation [19]. Thus, we  
166 analyzed the GC biases for seven sequencing platforms. We examined the distribution of GC  
167 content in sequencing reads and found that raw reads of all the seven sequencing platforms  
168 showed a similar GC content distribution to the human reference genome (Fig. S11). To better  
169 understand what parts of the genome were not covered properly, we generated GC-bias plots,  
170 showing relative coverage at each GC level. Unbiased sequencing would not be affected by  
171 GC composition, resulting in a flat line along with relative coverage = 1. We found that all the  
172 seven sequencing platforms provided nearly even coverage in the moderate-GC range 20% to  
173 60%, which represents approximately 95% of the human genome (Fig. 2). On the other hand,  
174 the relative coverage of the HiSeq2000 platform dropped fast above 60% GC than other  
175 platforms, while the NovaSeq6000 covered well above 60% GC, unlike the other platforms.

176

### 177 **Comparison of variants detected among seven sequencing platforms**

178 To investigate the performance of variant calling for the seven sequencing sequencers, we  
179 adopted the widely used pipeline BWA-MEM (BWA, RRID:SCR\_010910) [20] and GATK  
180 (GATK, RRID:SCR\_001876) [21-23]. We identified an average of 4.14 million single  
181 nucleotide variants (SNVs), and 0.61 million indels (insertion and deletion) on each of the

182 seven sequencing platforms (Table 3). The statistics of SNVs were similar across all the seven  
183 in terms of the dbSNP annotation rate (dbSNP153) and the transition/transversion (Ti/Tv) ratio,  
184 which indirectly reflects SNV calling accuracy. About 3.7 million SNV loci were found on all  
185 the seven sequencing platforms, and this accounts for 87% to 91% of the discovered SNVs on  
186 each platform (Table S7). We found 13,999 and 9,691 platform-specific SNVs on the MGI and  
187 Illumina platforms, respectively. To figure out the potential cause of the platform-specific  
188 SNVs, we checked how many of the SNVs were located on the platform-specifically covered  
189 regions. There were only 2.8% of Illumina platform-specific SNVs and 1.6% of MGI platform-  
190 specific SNVs that were located on the platform-specifically covered region (Table S8), and  
191 most of the platform-specific SNVs were located on regions with sufficient sequencing depths  
192 ( $>10\times$ ). It was also found that about 74% of platform-specific SNVs were located on the repeat  
193 region (Table S9). The number of singletons, variations found only in one platform, was higher  
194 for the Illumina ( $\sim 0.10$  million SNVs on average) than MGI ( $\sim 0.05$  million SNVs on average)  
195 sequencers (see Table S7). This means that the difference within the Illumina platforms is  
196 greater than the difference between the MGI platforms. Similar to the case of the platform-  
197 specific SNVs, a few singletons were found in the platform-specific covered region (0.5% in  
198 average), and most of the singletons were located on sufficiently high sequencing depth regions  
199 ( $>10\times$ , Table S10). About 74% of singletons were located on the repeat region (see Table S9).  
200 We speculate that the repeat region is one of the sources causing the platform-specific SNVs  
201 and singletons. We also analyzed the number of SNVs found in any six of the seven sequencing  
202 platforms, which we considered false negatives (Table S11). The HiSeq2000 had the largest  
203 number of false negatives (64,856 SNVs) among the seven sequencing platforms. The two  
204 MGI platforms (DNBSEQ-T7 and BGISEQ-500) had 18,826 and 15,657 false negatives,  
205 respectively, and those of the NovaSeq6000 showed the smallest number of false negatives  
206 (6,999 SNVs). To investigate the relationship between the sequencing platforms, an unrooted

207 tree was constructed using a total of 1,036,417 loci where the genotypes of one or more  
208 platforms differ from the rest of the platforms (Fig. 3 and Table S12). We found that the two  
209 MGI platforms grouped together, and they are the closest to the Illumina HiSeq2500 platform.  
210 The Illumina platforms were divided into two subgroups in the tree: a long read length (151  
211 bp) group, containing the HiSeq4000, HiSeqX10, and NovaSeq6000 platforms and a short read  
212 length ( $\leq 101$  bp) group, containing the HiSeq2000 and HiSeq2500 platforms. Read length  
213 primarily affects the detection of variants through alignment bias and alignment errors, which  
214 are higher for short reads because there is less chance of a unique alignment to the reference  
215 sequence than with longer reads [24].

216 Since it was not possible to conduct standard benchmarking procedures and determine  
217 error values for each platform in this study, we compared the variations called by the seven  
218 whole-genome sequences with an SNP genotyping chip as an independent platform. Of the  
219 total 950,585 comparable positions, more than 99.3% of the genotypes matched the WGS-  
220 based genotypes from the seven sequencing platforms (Table S13). We found that 4,356 loci  
221 in the SNP genotyping were inconsistent across all seven WGS-based genotyping results,  
222 suggesting that these loci are probably errors in the SNP genotyping chip. With the exception  
223 of HiSeq2000 and HiSeq4000, all the other platforms showed a similar concordance rate.

224

## 225 **Discussion**

226 Our benchmarks provided here can provide a useful but rough estimation of the quality of  
227 short-read based whole-genome sequencers. We used the same individual's samples for all  
228 seven sequencing platforms but these were collected at different time points over the past seven  
229 years. Just one human sample cannot justify the variation that may occur among different

230 individuals, extracted DNA molecules, and overall sequencing qualities. Furthermore, the  
231 sequencing quality may vary greatly depending on the version of the library preparation kit,  
232 even on the same platform [25]. These are clear limitations of our benchmarking, however, as  
233 our purpose was to compare two major platforms, namely Illumina and MGI, the whole  
234 genome data from just one individual can function as an intuitive index for researchers who  
235 are considering purchasing large sequencers to generate a very large amount of sequencing  
236 data (Table S14). Our method of statistical analysis does not allow us to conclude which of the  
237 seven sequencing instruments is the most accurate and precise as there is much variation in the  
238 sample preparation and sequencer specifications. Nevertheless, overall, the data generated by  
239 the Illumina and MGI sequencing platforms showed comparable levels of quality, sequencing  
240 uniformity, %GC coverage, and concordance rate with SNP genotyping, thus it can be broadly  
241 concluded that the MGI platforms can be used for a wide range of research tasks on a par with  
242 Illumina platforms, and at a lower cost [7].

243

## 244 **Materials and Methods**

### 245 **Genomic DNA extraction and SNP genotyping**

246 Genomic DNA used for genotyping and sequencing were extracted from the peripheral blood  
247 of a Korean male sample donor (KOREF). The genomic DNA was extracted using the DNeasy  
248 Blood & Tissue kit (Qiagen, Valencia, CA) according to the manufacturer's recommendations.  
249 DNA quality was assessed by running 1  $\mu$ l on the Bioanalyzer system (Agilent) to ensure size  
250 and analysis of DNA fragments. The concentration of DNA was assessed using the dsDNA BR  
251 assay on a Qubit fluorometer (Thermo Fisher). We conducted a genotyping experiment using  
252 the Illumina Infinium Omni1 quad chip according to the manufacturer's protocols. The  
253 Institutional Review Board (IRB) at Ulsan National Institute of Science and Technology  
254 approved the study (UNISTIRB-15-19-A).

255

### 256 **Illumina paired-end library construction and sequencing**

257 High-molecular weight genomic DNA was sheared using a Covaris S2 ultra sonicator system,  
258 in order to get appropriate sizes. Libraries with short inserts of 500 bp for HiSeq2000, 400 bp  
259 for HiSeq2500 (RRID:SCR\_016383) and HiSeq4000 (RRID:SCR\_016386), and 450 bp for  
260 HiSeqX10 and NovaSeq6000 for paired-end reads were prepared using TruSeq DNA sample  
261 prep kit following the manufacturer's protocol. Products were quantified using the Bioanalyzer  
262 (Agilent, Santa Clara, CA, USA) and the raw data were generated by each Illumina platform.  
263 Further image analysis and base calling were conducted with the Illumina pipeline using default  
264 settings.

265

## 266 **MGI paired-end library construction and sequencing**

267 The KOREF genomic DNA was fragmented by Frag enzyme (MGI) to DNA fragments  
268 between 100 bp and ~1,000 bp suitable for PE100 sequencing according to the manufacturer's  
269 instructions (MGI FS DNA library prep set, cat no; 1000005256). The fragmented DNA was  
270 further selected to be between 300 bp and ~500 bp by DNA clean beads (MGI). The selected  
271 DNA fragments were then repaired to obtain a blunt end and modified at the 3' end to get a  
272 dATP as a sticky end. The dTTP tailed adapter sequence was ligated to both ends of the DNA  
273 fragments. The ligation product was then amplified for seven cycles and subjected to the  
274 following single-strand circularization process. The PCR product was heat-denatured together  
275 with a special molecule that was reverse-complemented to one special strand of the PCR  
276 product, and the single-strand molecule was ligated using DNA ligase. The remaining linear  
277 molecule was digested with the exonuclease, finally obtaining a single-strand circular DNA  
278 library. We sequenced the DNA library using BGISEQ-500 (RRID:SCR\_017979) and  
279 DNBSEQ-T7 (RRID:SCR\_017981) with a pair-end read length of 100bp.

280

## 281 **Raw data preprocessing**

282 We used the FastQC v0.11.8 (FastQC, RRID:SCR\_014583) [12] to assess overall sequencing  
283 quality for MGI and Illumina sequencing platforms. PCR duplications (reads were considered  
284 duplicates when forward read and reverse read of the two paired-end reads were identical) were  
285 detected by the PRINSEQ v0.20.4 (PRINSEQ, RRID:SCR\_005454) [26]. The random  
286 sequencing error rate was calculated by measuring the occurrence of 'N' bases at each read  
287 position in raw reads. Reads with sequencing adapter contamination were examined according



288 to the manufacturer's adapter sequences (Illumina sequencing adapter left =  
289 "GATCGGAAGAGCACACGTCTGAACTCCAGTCAC", Illumina sequencing adapter right =  
290 "GATCGGAAGAGCGTCGTGTAGGGAAAGAGTGT", MGI sequencing adapter left =  
291 "AAGTCGGAGGCCAAGCGGTCTTAGGAAGACAA", and MGI sequencing adapter right =  
292 "AAGTCGGATCGTAGCCATGTCGTTCTGTGAGCCAAGGAGTTG"). We conducted base  
293 quality filtration of raw reads using the NGS QC Toolkit v2.3.3 (cutoff read length for high  
294 quality 70; cutoff quality score, 20) (NGS QC Toolkit, RRID:SCR\_005461) [27]. We used  
295 clean reads after removing low-quality reads and adapter containing reads for the mapping step.

296

### 297 **Mapping, variant calling, and coverage calculation**

298 After the filtering step, clean reads were aligned to the human reference genome (GRCh38)  
299 using BWA-MEM v0.7.12, and duplicate reads were removed using Picard v2.6.0 (Picard,  
300 RRID:SCR\_006525) [28]. After removing duplicate reads, we down-sampled the deduplicated  
301 clean reads of all the sequencing platforms to 24× coverage according to the amount of the  
302 deduplicated clean reads of HiSeq2000 for a fair comparison. Realignment and base score  
303 recalibration of the bam file was processed by GATK v3.3. Single nucleotide variants, short  
304 insertions, and deletions were called with the GATK (Unifiedgenotyper, options --  
305 output\_mode EMIT\_ALL\_SITES --genotype\_likelihoods\_model BOTH). The resulting  
306 variants were annotated with the dbSNP (v153) database [29]. Coverage was calculated for  
307 each nucleotide using SAMtools v1.9 (SAMTOOLS, RRID:SCR\_002105) [30]. We defined a  
308 specific covered region based on the 100 bp non-overlapping windows by calculating the  
309 average depth of the windows followed by a statistical test. We used edgeR method as the  
310 statistical test [16]. *P*-values are adjusted by Benjamini-Hochberg correction. GC coverage for

311 raw reads and the genome was calculated by the average %GC of the 100bp non-overlapping  
312 windows.

313

### 314 **Variant comparison and concordance rate with SNP genotyping**

315 The chromosome position and genotype of each variant called from each sequencing platform  
316 was used to identify the relationship between seven sequencing platforms. We compared  
317 1,036,417 loci found on one or more platforms for locations where genotypes were determined  
318 on all the seven platforms. An unrooted tree was generated using FastTree v2.1.10 (FastTree,  
319 RRID:SCR\_015501) [31] with the generalized time-reversible (GTR) model. For calculating  
320 the concordance rate between SNP genotyping and WGS-based genotype, the coordinates of  
321 SNP genotyping data were converted to GRCh38 assembly using the UCSC LiftOver tool [32].  
322 We removed unmapped positions and indel markers and used only markers that were present  
323 on the autosomal chromosomes.

324

### 325 **Availability of Supporting Data and Materials**

326 All sequences generated in this study, including the HiSeq2000, HiSeq2500, HiSeq4000,  
327 HiSeqX10, NovaSeq6000, BGISEQ-500, and DNBSEQ-T7 sequencing reads, were deposited  
328 in the NCBI Sequence Read Archive database under BioProject PRJNA600063. All  
329 benchmarking data is hosted and distributed from the [biosequencer.org](http://biosequencer.org) homepage [33], and  
330 supporting data and materials are also available at *GigaScience* GigaDB [34].

331

## 332 **Additional Files**

333 Additional file 1: **Figure S1**. Distribution of nucleotide quality across seven sequencing  
334 platforms. **Figure S2**. Base quality filtration statistics for seven sequencing platforms. **Figure**  
335 **S3**. Random error ratio for seven sequencing platforms. **Figure S4**. Insert-size distributions for  
336 seven sequencing platforms. **Figure S5**. The coverage distribution of two MGI and five  
337 Illumina platforms. **Figure S6**. Depth distribution of chromosome 8. **Figure S7**. Depth  
338 distribution of chromosome 12. **Figure S8**. Depth distribution of chromosome 18. **Figure S9**.  
339 Depth distribution of chromosome 20. **Figure S10**. GC distribution of platform-specific  
340 covered regions. **Figure S11**. The GC composition distribution of the human genome and  
341 sequencing reads. **Table S1**. Base quality summary. **Table S2**. Duplicate reads, random error  
342 base, and adapter read rate. **Table S3**. The putatively erroneous *K*-mers ( $\leq 3$  *K*-mer depth) for  
343 seven sequencing platforms. **Table S4**. Mapping and duplicate rate of samples using MGI's  
344 PE100 protocol and DNBSEQ-T7. **Table S5**. Statistics of clean reads for seven sequencing  
345 platforms. **Table S6**. Statistics for platform-specific covered regions. **Table S7**. The number  
346 of shared SNVs for seven sequencing platforms. **Table S8**. Statistics of platform-specific SNVs.  
347 **Table S9**. Statistics of platform-specific SNVs and singleton in the repeat region. **Table S10**.  
348 Statistics of singleton variants. **Table S11**. The number of SNVs not found on a specific  
349 platform. **Table S12**. Genotype concordance rate among seven sequencing platforms. **Table**  
350 **S13**. Genotype comparison between SNP genotyping and WGS. **Table S14**. Recent studies for  
351 MGI and Illumina platform comparison.

352

## 353 **List of abbreviations**

354 PE: paired-end;  
355 WGS: whole-genome sequencing;  
356 BWA: burrows-wheeler aligner;  
357 SNVs: single nucleotide variants;  
358 indels: insertions and deletions;  
359 Ti/Tv: transition/transversion;  
360 GATK: Genome Analysis ToolKit;

361

## 362 **Competing Interests**

363 H.M.K., O.C., Y.S.C., J.H.J., H.Y.L., and Y.Y. are employees, J.B. is the chief executive  
364 officer of Clinomics Inc. H.M.K., Y.S.C., and J.B. have an equity interest in the company. All  
365 other co-authors declare that they have no competing interests.

366

## 367 **Funding**

368 This work was supported by the Research Project Funded by the Ulsan City Research Fund  
369 (1.200047.01) of the Ulsan National Institute of Science & Technology (UNIST) and  
370 Clinomics and Geromics Ltd internal funding. This work was also supported by the  
371 Technology Innovation Program (20010587, Development and Dissemination on National

372 Standard Reference Data) funded by the Ministry of Trade, Industry & Energy (MOTIE,  
373 Korea).

374

### 375 **Authors' contributions**

376 J.B. supervised and coordinated the project. J.B. and Y.S.C. conceived and designed the  
377 experiments. H.M.K., S.J., O.C., J.H.J., H.Y.L., and Y.Y. conducted the bioinformatics data  
378 processing and analyses. H.M.K., S.J., D.M.B., and J.B. wrote and revised the manuscript. A.B.  
379 and H.S.K. reviewed and edited the manuscript. All authors have read and approved the final  
380 manuscript.

381

### 382 **Acknowledgments**

383 We thank the Korea Institute of Science and Technology Information (KISTI) for providing us  
384 with the Korea Research Environment Open NETwork (KREONET). We thank Jaesu Bhak  
385 for editing.

386

387 **References**

- 388 1. Wetterstrand K. DNA sequencing costs: data: data from the NHGRI Genome  
389 Sequencing Program (GSP). 2018, [https://www.genome.gov/about-genomics/fact-](https://www.genome.gov/about-genomics/fact-sheets/DNA-Sequencing-Costs-Data)  
390 [sheets/DNA-Sequencing-Costs-Data](https://www.genome.gov/about-genomics/fact-sheets/DNA-Sequencing-Costs-Data) (12 March 2020, date last accessed)
- 391 2. Huddleston J, Chaisson MJP, Steinberg KM, et al. Discovery and genotyping of  
392 structural variation from long-read haploid genome sequence data. *Genome Res*  
393 2017;**27**(5):677-85.
- 394 3. Goodwin S, McPherson JD and McCombie WR. Coming of age: ten years of next-  
395 generation sequencing technologies. *Nat Rev Genet* 2016;**17**(6):333-51.
- 396 4. Drmanac R, Sparks AB, Callow MJ, et al. Human genome sequencing using unchained  
397 base reads on self-assembling DNA nanoarrays. *Science* 2010;**327**(5961):78-81.
- 398 5. Huang J, Liang X, Xuan Y, et al. A reference human genome dataset of the BGISEQ-  
399 500 sequencer. *Gigascience* 2017;**6**(5):1-9.
- 400 6. Chen J, Li X, Zhong H, et al. Systematic comparison of germline variant calling  
401 pipelines cross multiple next-generation sequencers. *Sci Rep.* 2019;**9** 1:9345.  
402 doi:10.1038/s41598-019-45835-3.
- 403 7. Jeon SA, Park JL, Kim JH, et al. Comparison of the MGISEQ-2000 and Illumina HiSeq  
404 4000 sequencing platforms for RNA sequencing. *Genomics Inform.* 2019;**17** 3:e32.  
405 doi:10.5808/GI.2019.17.3.e32.
- 406 8. Fang C, Zhong H, Lin Y, et al. Assessment of the cPAS-based BGISEQ-500 platform  
407 for metagenomic sequencing. *Gigascience.* 2018;**7** 3:1-8.  
408 doi:10.1093/gigascience/gix133.
- 409 9. Lu R, Zhao X, Li J, et al. Genomic characterisation and epidemiology of 2019 novel  
410 coronavirus: implications for virus origins and receptor binding. *Lancet.* 2020;**395**

- 411 10224:565-74. doi:10.1016/S0140-6736(20)30251-8.
- 412 10. Kim D, Lee JY, Yang JS, et al. The Architecture of SARS-CoV-2 Transcriptome. *Cell*.  
413 2020;181 4:914-21 e10. doi:10.1016/j.cell.2020.04.011.
- 414 11. Cho YS, Kim H, Kim HM, et al. An ethnically relevant consensus Korean reference  
415 genome is a step towards personal reference genomes. *Nat Commun*. 2016;7:13637.  
416 doi:10.1038/ncomms13637.
- 417 12. Andrews S, Krueger F, Segonds-Pichon A, et al. FastQC. Babraham. 2012.  
418 <https://www.bioinformatics.babraham.ac.uk/projects/fastqc/>. Accessed 08 February  
419 2021.
- 420 13. Zhao L, Xie J, Bai L, et al. Mining statistically-solid k-mers for accurate NGS error  
421 correction. *BMC Genomics*. 2018;19 Suppl 10:912. doi:10.1186/s12864-018-5272-y.
- 422 14. Liu B, Shi Y, Yuan J, et al. Estimation of genomic characteristics by analyzing k-mer  
423 frequency in de novo genome projects. *arXiv preprint arXiv:13082012*. 2013.
- 424 15. Dohm JC, Lottaz C, Borodina T, et al. Substantial biases in ultra-short read data sets  
425 from high-throughput DNA sequencing. *Nucleic Acids Res*. 2008;36 16:e105.  
426 doi:10.1093/nar/gkn425.
- 427 16. Robinson MD, McCarthy DJ, Smyth GK. edgeR: a Bioconductor package for  
428 differential expression analysis of digital gene expression data. *Bioinformatics*.  
429 2010;26 1:139-140. doi:10.1093/bioinformatics/btp616.
- 430 17. Kozarewa I, Ning Z, Quail MA, et al. Amplification-free Illumina sequencing-library  
431 preparation facilitates improved mapping and assembly of (G+C)-biased genomes. *Nat*  
432 *Methods*. 2009;6 4:291-5. doi:10.1038/nmeth.1311.
- 433 18. Aird D, Ross MG, Chen WS, et al. Analyzing and minimizing PCR amplification bias  
434 in Illumina sequencing libraries. *Genome Biol*. 2011;12 2:R18. doi:10.1186/gb-2011-  
435 12-2-r18.

- 436 19. Oyola SO, Otto TD, Gu Y, et al. Optimizing Illumina next-generation sequencing  
437 library preparation for extremely AT-biased genomes. *BMC Genomics*. 2012;13:1.  
438 doi:10.1186/1471-2164-13-1.
- 439 20. Li H. Aligning sequence reads, clone sequences and assembly contigs with BWA-  
440 MEM. arXiv preprint arXiv:13033997. 2013.
- 441 21. DePristo MA, Banks E, Poplin R, et al. A framework for variation discovery and  
442 genotyping using next-generation DNA sequencing data. *Nat Genet*. 2011;43 5:491-8.  
443 doi:10.1038/ng.806.
- 444 22. Van der Auwera GA, Carneiro MO, Hartl C, et al. From FastQ data to high confidence  
445 variant calls: the Genome Analysis Toolkit best practices pipeline. *Curr Protoc*  
446 *Bioinformatics*. 2013;43:11 0 1- 0 33. doi:10.1002/0471250953.bi1110s43.
- 447 23. McKenna A, Hanna M, Banks E, et al. The Genome Analysis Toolkit: a MapReduce  
448 framework for analyzing next-generation DNA sequencing data. *Genome Res*. 2010;20  
449 9:1297-303. doi:10.1101/gr.107524.110.
- 450 24. Patch AM, Nones K, Kazakoff SH, et al. Germline and somatic variant identification  
451 using BGISEQ-500 and HiSeq X Ten whole genome sequencing. *PLoS One*. 2018;13  
452 1:e0190264. doi:10.1371/journal.pone.0190264.
- 453 25. Rhodes J, Beale MA and Fisher MC. Illuminating choices for library prep: a  
454 comparison of library preparation methods for whole genome sequencing of  
455 *Cryptococcus neoformans* using Illumina HiSeq. *PLoS One*. 2014;9 11:e113501.  
456 doi:10.1371/journal.pone.0113501.
- 457 26. Schmieder R and Edwards R. Quality control and preprocessing of metagenomic  
458 datasets. *Bioinformatics*. 2011;27 6:863-4. doi:10.1093/bioinformatics/btr026.
- 459 27. Patel RK and Jain M. NGS QC Toolkit: a toolkit for quality control of next generation  
460 sequencing data. *PLoS One*. 2012;7 2:e30619. doi:10.1371/journal.pone.0030619.



- 461 28. Institute B: Picard: A set of command line tools (in Java) for manipulating high-  
462 throughput sequencing (HTS) data and formats such as SAM/BAM/CRAM and VCF.  
463 GitHub 2018. <http://broadinstitute.github.io/picard/>.
- 464 29. Sherry ST, Ward MH, Kholodov M, et al. dbSNP: the NCBI database of genetic  
465 variation. *Nucleic Acids Res.* 2001;29 1:308-11. doi:10.1093/nar/29.1.308.
- 466 30. Li H, Handsaker B, Wysoker A, et al. The Sequence Alignment/Map format and  
467 SAMtools. *Bioinformatics.* 2009;25 16:2078-9. doi:10.1093/bioinformatics/btp352.
- 468 31. Price MN, Dehal PS and Arkin AP. FastTree 2--approximately maximum-likelihood  
469 trees for large alignments. *PLoS One.* 2010;5 3:e9490.  
470 doi:10.1371/journal.pone.0009490.
- 471 32. Kuhn RM, Haussler D and Kent WJ. The UCSC genome browser and associated tools.  
472 *Brief Bioinform.* 2013;14 2:144-61. doi:10.1093/bib/bbs038.
- 473 33. BioSequencer, <http://biosequencer.org>. Accessed 08 February 2021.
- 474 34. Kim H, Jeon S, Chung O, et al. Supporting data for "Comparative analysis of seven sh  
475 ort-reads sequencing platforms using the Korean Reference Genome: MGI and Illumi  
476 na sequencing benchmark for whole-genome sequencing" *GigaScience Database* 2021  
477 <http://dx.doi.org/10.5524/100865>.
- 478

479 **Figures**

480

481 **Figure 1. Distribution of  $K$ -mer frequency for 21-mers using raw reads from seven**  
482 **sequencing platforms.** The x-axis represents  $K$ -mer depth, and the y-axis represents the  
483 proportion of  $K$ -mer, as calculated by the frequency at that depth divided by the total frequency  
484 at all depths.

485

486 **Figure 2. GC-bias plots for seven sequencing platforms.** Unbiased coverage is represented  
487 by a horizontal dashed line at relative coverage = 1. A relative coverage below 1 indicates  
488 lower than expected coverage and above 1 indicates higher than expected coverage.

489

490 **Figure 3. An unrooted tree for seven sequencing platforms showing the similarity of the**  
491 **variant calling.** Numbers of nodes denote bootstrap values based on 1,000 replicates.

492

493

494 **Tables**

495

496 **Table 1. Raw read statistics for seven sequencing platforms**

| Metrics                             | Illumina platforms |               |               |               |               | MGI platforms |               |
|-------------------------------------|--------------------|---------------|---------------|---------------|---------------|---------------|---------------|
|                                     | HiSeq2000          | HiSeq2500     | HiSeq4000     | HiSeqX10      | NovaSeq6000   | BGISEQ-500    | DNBSEQ-T7     |
| Production date                     | 2012               | 2015.03       | 2015.10       | 2015.12       | 2019.04       | 2017.04       | 2019.09       |
| Quality range                       | Illumina 1.5+      | Illumina 1.8+ | Illumina 1.8+ | Illumina 1.8+ | Illumina 1.8+ | Illumina 1.8+ | Illumina 1.8+ |
| # of Total read                     | 1,044M             | 1,500M        | 629M          | 833M          | 833M          | 1,171M        | 1,035M        |
| Read length (bp)                    | 90 PE              | 101 PE        | 151 PE        | 151 PE        | 151 PE        | 100 PE        | 100 PE        |
| Total bases                         | 94 Gb              | 151.5 Gb      | 95 Gb         | 125.8 Gb      | 125.8 Gb      | 117.1 Gb      | 103.4 Gb      |
| Sequencing depth (×, based on 3 Gb) | 31.31              | 50.52         | 31.65         | 41.94         | 41.94         | 39.04         | 34.49         |

497

498

499 **Table 2. Mapping and coverage statistics**

| Metrics                             | HiSeq2000   | HiSeq2500     | HiSeq4000   | HiSeqX10    | NovaSeq6000 | BGISEQ-500    | DNBSEQ-T7   |
|-------------------------------------|-------------|---------------|-------------|-------------|-------------|---------------|-------------|
| # of clean reads                    | 935,951,974 | 1,050,028,628 | 512,891,970 | 705,987,420 | 706,000,000 | 1,060,837,856 | 991,021,996 |
| Read length                         | 90          | 101           | 151         | 151         | 151         | 100           | 100         |
| Clean bases (Gb)                    | 84.23       | 106.05        | 77.45       | 106.60      | 106.6       | 106.08        | 99.1        |
| Clean read depth (based on 3 Gb, ×) | 28.08       | 35.35         | 25.82       | 35.53       | 35.54       | 35.36         | 33.03       |
| Mapping rate                        | 99.986%     | 99.999%       | 99.990%     | 99.999%     | 99.9996%    | 99.983%       | 99.999%     |
| Properly mapped rate*               | 96.67%      | 98.30%        | 97.24%      | 96.91%      | 97.15%      | 97.44%        | 98.17%      |
| Duplicate rate                      | 15.35%      | 3.01%         | 3.19%       | 5.08%       | 3.39%       | 2.56%         | 8.77%       |
| Duplicate clean read depth (×)      | 23.90       | 34.29         | 24.99       | 33.73       | 34.33       | 34.46         | 30.14       |
| Down-sampled depth (×)              | 23.90       | 23.90         | 23.90       | 23.90       | 23.90       | 23.90         | 23.90       |
| Coverage                            | 99.68%      | 99.82%        | 99.71%      | 99.81%      | 99.76%      | 99.83%        | 99.83%      |
| Coverage at least 5×                | 98.62%      | 99.30%        | 98.37%      | 99.30%      | 99.19%      | 99.34%        | 99.24%      |
| Coverage at least 10×               | 94.63%      | 96.65%        | 93.98%      | 97.05%      | 96.89%      | 97.05%        | 96.61%      |
| Coverage at least 15×               | 85.10%      | 88.54%        | 85.08%      | 90.23%      | 90.36%      | 90.11%        | 89.36%      |

500 \* Both of the read mates are in the correct orientation.

**Table 3. Variant statistics of Illumina and MGI sequencing platforms.**

| Metrics                  | HiSeq2000     | HiSeq2500     | HiSeq4000     | HiSeqX10      | NovaSeq6000   | BGISEQ-500    | DNBSEQ-T7     |
|--------------------------|---------------|---------------|---------------|---------------|---------------|---------------|---------------|
| Reference homozygous     | 2,839,358,003 | 2,855,619,759 | 2,855,062,233 | 2,864,272,103 | 2,861,198,782 | 2,851,898,568 | 2,853,066,635 |
| # of no call positions   | 80,241,142    | 63,980,549    | 64,532,078    | 55,244,498    | 58,311,103    | 67,747,107    | 66,584,361    |
| No call rate             | 2.74%         | 2.19%         | 2.21%         | 1.89%         | 1.99%         | 2.32%         | 2.28%         |
| Total SNVs               | 4,133,925     | 4,132,468     | 4,138,296     | 4,216,589     | 4,223,612     | 4,088,645     | 4,082,103     |
| Total SNVs in dbSNP      | 4,094,212     | 4,114,993     | 4,112,253     | 4,198,005     | 4,184,100     | 4,070,101     | 4,064,986     |
| dbSNP rate               | 99.04%        | 99.58%        | 99.37%        | 99.56%        | 99.06%        | 99.55%        | 99.58%        |
| Singleton                | 159,429       | 78,109        | 98,574        | 100,158       | 104,052       | 52,127        | 51,978        |
| Singleton in dbSNP       | 126,762       | 68,673        | 78,361        | 89,094        | 73,177        | 41,092        | 41,743        |
| dbSNP rate for Singleton | 79.51%        | 87.92%        | 79.49%        | 88.95%        | 70.33%        | 78.83%        | 80.31%        |
| Homozygous               | 1,703,616     | 1,690,878     | 1,704,813     | 1,708,639     | 1,714,752     | 1,688,328     | 1,689,834     |
| Heterozygous             | 2,430,309     | 2,441,590     | 2,433,483     | 2,507,950     | 2,508,860     | 2,400,317     | 2,392,269     |
| Het/Hom ratio            | 1.43          | 1.44          | 1.43          | 1.47          | 1.46          | 1.42          | 1.42          |
| Ti/Tv ratio              | 1.91          | 1.92          | 1.9           | 1.88          | 1.85          | 1.92          | 1.92          |
| Total Indels             | 526,504       | 546,918       | 491,899       | 689,357       | 708,062       | 703,873       | 631,163       |
| Total Indels in dbSNP    | 524,738       | 544,866       | 489,777       | 686,916       | 705,553       | 701,802       | 629,314       |
| dbSNP rate               | 99.66%        | 99.62%        | 99.57%        | 99.65%        | 99.65%        | 99.71%        | 99.71%        |
| Singleton                | 7,864         | 7,444         | 8,094         | 17,036        | 23,596        | 41,384        | 12,092        |
| Singleton in dbSNP       | 7,612         | 7,259         | 7,915         | 16,784        | 23,303        | 41,183        | 11,964        |
| dbSNP rate for Singleton | 96.80%        | 97.51%        | 97.79%        | 98.52%        | 98.76%        | 99.51%        | 98.94%        |



Figure 2

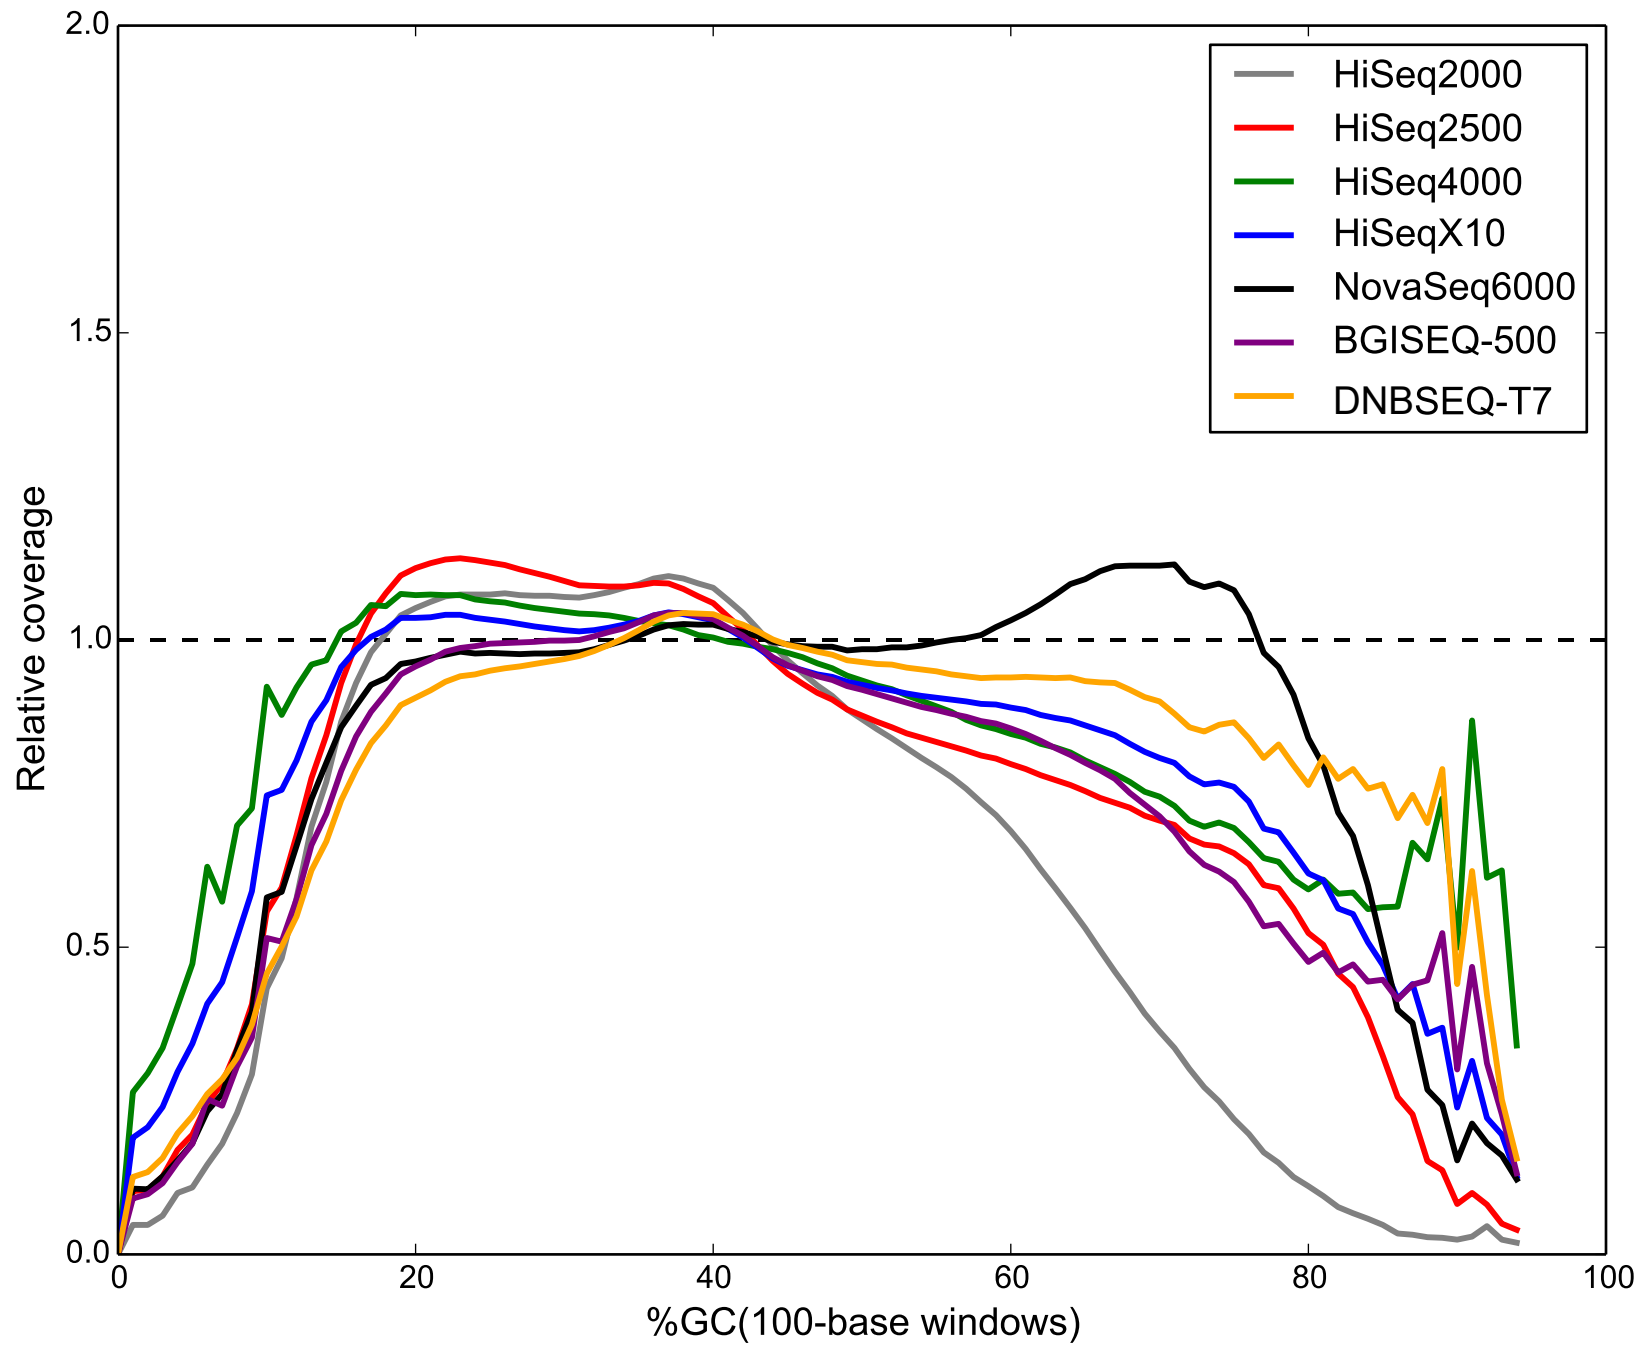

Figure 3

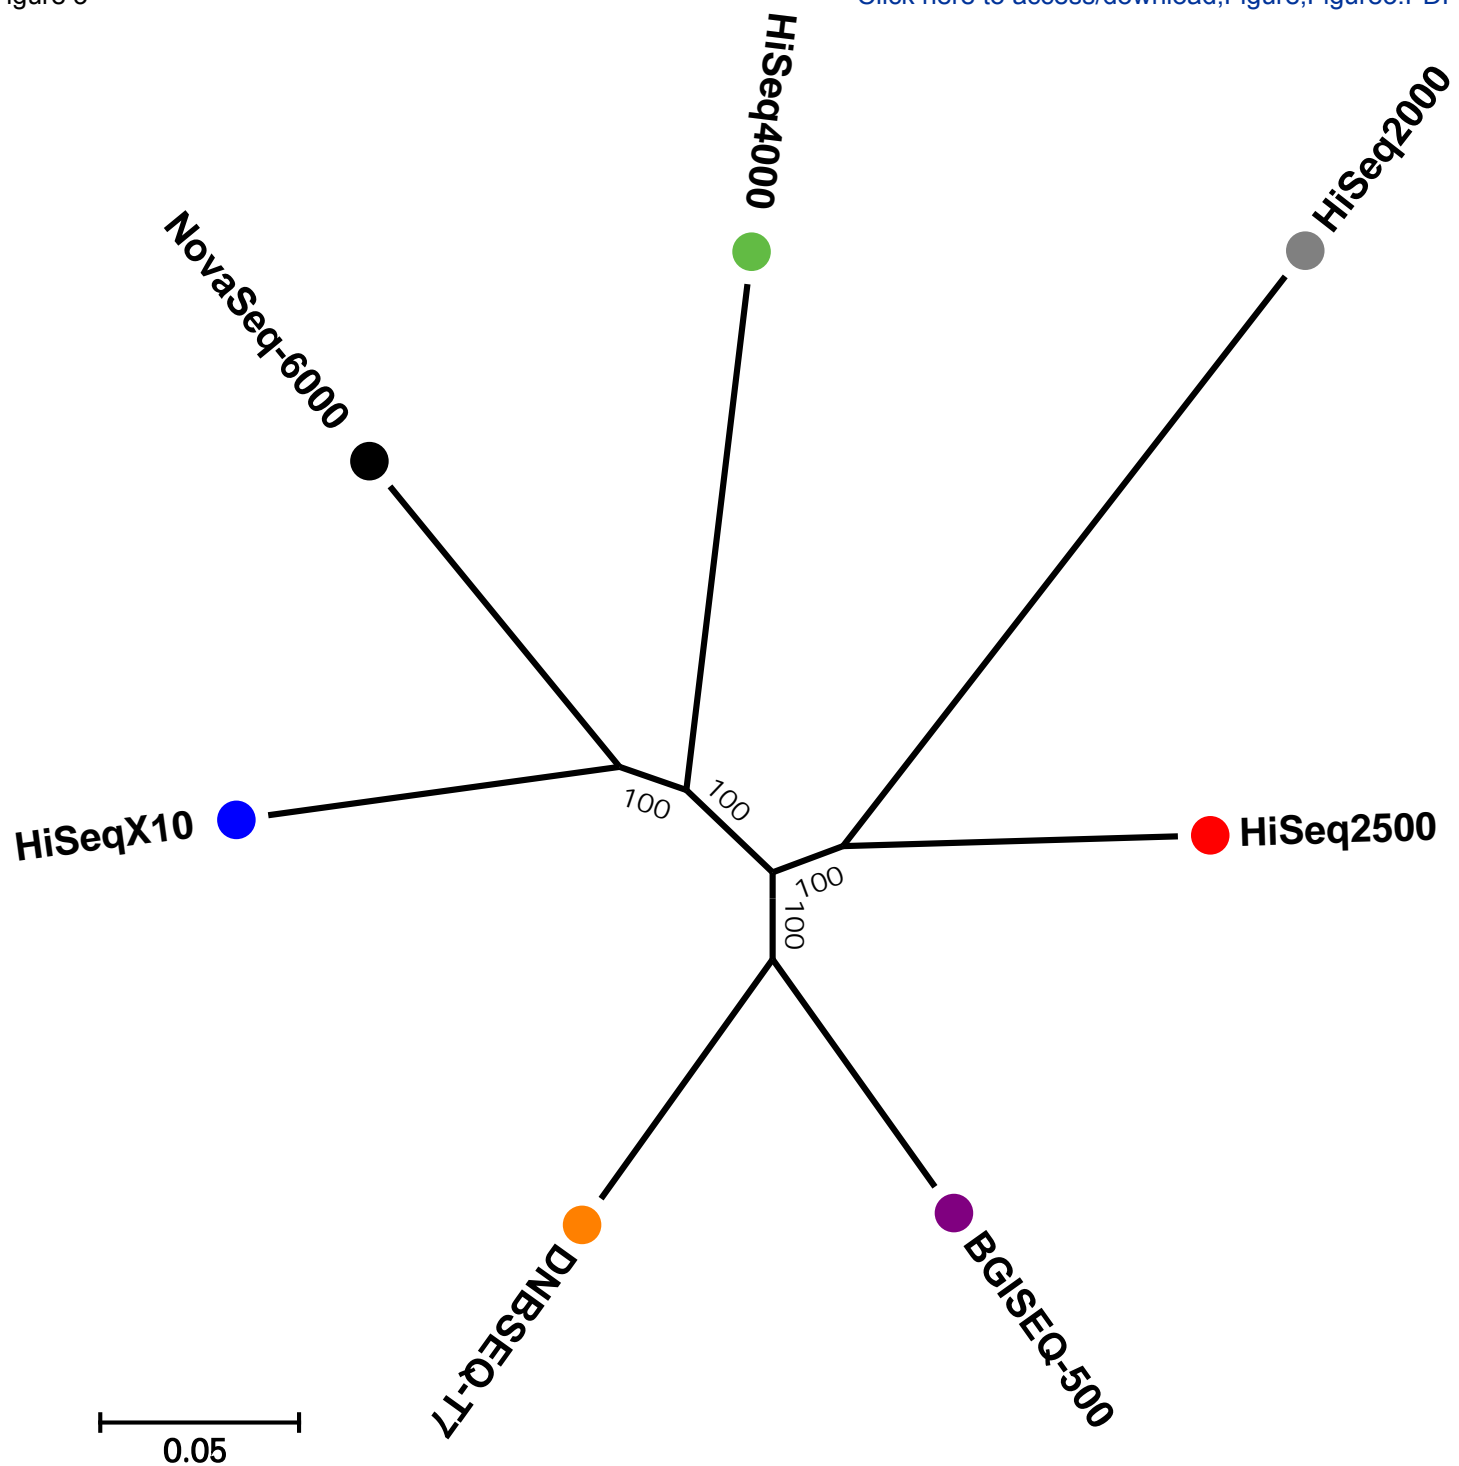



Click here to access/download

**Supplementary Material**

Sequencing\_Platform\_Comparison\_RevisionNote\_2nd\_r  
evision.docx



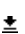

**GIGA-D-20-00072**

Dear *GigaScience* editors,

Thank you very much for processing our manuscript for enhancing science and genomics.

We evaluated the reviewers' comments and have edited the manuscript to accommodate the reviewers' concerns on clarity and better presentation of our results. Please see the detailed point-by-point revision notes that are submitted on-line.

We hope that our revision will be suitable for your journal's standards.

Sincerely yours,

Jong Bhak, Ph.D.,  
Professor, Biomedical Engineering,  
KOGIC (Korean Genomics Center), UNIST, Ulsan, Korea  
[jongbhak@genomics.org](mailto:jongbhak@genomics.org)

Dan M. Bolser, Ph.D.,  
Director, Geromics Inc.  
dan@geromics.co.uk;

29<sup>th</sup> Dec. 2020
