# Supplementary material for: Comparative analysis of 7 short-read sequencing platforms using the Korean Reference Genome: MGI and Illumina sequencing benchmark for whole-genome sequencing
Source: PubMed Central journal article supplement (PMC7953489; doi:10.1093/gigascience/giab014), 2021-03-12
Supplement: giab014_response_to_reviewer_comments_original_submission.pdf [file giab014_response_to_reviewer_comments_original_submission.pdf]

## Author's Response To Reviewer Comments

Close

### Reviewer reports:

Reviewer #1: In this manuscript, Kim et al. compared seven sequencing platforms, including 2 MGI platforms (BGISEQ-500 and HiSeq4000, HiSeqX10, and NovaSeq6000), by using one human genome. The sequencing quality of different sequencing platforms was compared by using a variant statistic. Overall the manuscript is suitable to be published on Giga Science after a major revision. There are several points that need to be addressed. => Thank you for precise and critical feedback. We have modified the text and added further analysis to accommodate the reviewer's comments.

1. This work only contains samples from one human individual. It's really hard to reach a confident conclusion based on such a small sample size. => It is a generally correct point. However, both platforms produce massive amounts of sequences and the sample number of the two sets of platforms are similar or dissimilar in terms of variant calling.

This work still needs more samples and even replicates (both Cross-platform replicates and intra-platform replicates) to draw a more confident conclusion. => We think this is a practically important point. Unfortunately, we have not generated replicates for each sequencer. First, it is difficult to get a sample and each sequencing batch can contain multiple replicates or not. It is because each platform has a different amount of sequences in a certain common replicate number. We stated these limitations in the discussion part of the manuscript. We compared the two platforms (MGI and Illumina).

2. The samples for sequencing were extracted on different points of time from the individual, that we wonder if the difference is caused by different sampling time and the bias of sampling process.

=> There must be some problems caused by the different sampling time and the sampling process mentioned by the reviewer. The first sampling time is about 7 years and the last sampling time is about 7 years. It is known that the human germline mutation rate is approximately  $0.5 \times 10^{-8}$  per site per year, which means that 10.5 germline mutations can be accumulated in 7 years. In this respect, although the mutation rate of the germline cell, the number of mutations accumulated over the 7 years would be much lower than the difference between platforms, it may have a significant effect on the results.

For the case of sampling process bias, we stated in the discussion part of the manuscript that there is a clear limitation in the current study. As mentioned, we think our study is still meaningful in that it provides the data generated by the short read-based whole genome sequencing compared with the long existing common Illumina platforms with the relatively new MGISEQ-T7 platform using one human whole genome.

3. This manuscript needs to show more detail about the sequencing process, such as the number of the flow cell and sequencing depth for each sequencing platform needs.

=> We added the detailed methods for DNA extraction, library preparation, and sequencing process in the Materials and Methods section.

4. In order to compare, the sequencing data of seven sequencing platforms need to have the same genome coverage.

=> Very good point. As pointed out by the reviewer, we set the same genome coverage of the seven platforms and updated the Results section (S5 and Table S4).

5. The results of the manuscript let me worry about the quality of the sequencing data generated from HiSeq2000 and HiSeq4000. The quality of the sequencing data the author found were normal.

=> HiSeq2000 and HiSeq4000 platforms are old, and their quality is not good compared to other platforms in our case. Currently, they are often not available in sequencing centers and, also, it is quite expensive to run them now. Still, to compare with MGI platforms, we used them.

6. According to the official information, MGI platforms have low duplicate rate than any sequencing platform which needs to be addressed. The authors prove their finding by using other samples or individuals.

=> The official information showed a duplicate rate of less than 3% when using a PCR free library kit. However, we used a PCR library kit and the duplicate rate is higher than the manufacturer's official information. We provide the table presenting the mapping rates and duplicate rates of the KOREF sample. We found that the duplicate rates of the other human samples that were sequenced simultaneously with the KOREF sample were lower than the KOREF sample.

<https://github.com/howmany2/SequencingPlatformComparison/raw/master/Mapping%20and%20duplicate%20rate%20of%20KOREF%20sample.pdf>

An FS library kit containing PCR steps was used for MGISEQ-T7 sequencing of the KOREF sample. Furthermore, according to the official information, the high duplication rate, and the new PE150 (Paired-end 150 bp) protocol has a duplication rate less than 3%. We used the PE150 protocol and relatively many duplicated reads were found from the reads generated by the MGISEQ-T7 platform. However, we think that the duplication rate is acceptable after removing duplicate reads and matching to the same genome coverage for the seven sequencing platforms.

7. The methods for identifying the platform-specific covered region are unreasonable as different sequencing platforms have different genome coverages.  
=> We agree with the reviewer's comment. We set the same genome coverage of the seven platforms and updated the results. The MGI platform coverage decreased from 1,516 to 1,436, and in the case of Illumina, increased from 2,264 to 2,881. However, it was confirmed as before meaning that the MGI platform covers a higher GC area (see Figure S10).

8. The Comparison of variants detected among seven platforms needs further analysis. Authors need a standard SNP and sequencing or other methods, to replace the dbSNP and SNP genotype chip as a compare object. What the relationship of the variants with the KOREF, which can give FP, FN, and sequencing error information, and, for this reason, we could not make a design for this comparison among the platforms. As an alternative, we examined how much difference exists among the sequences generated by different NGS platforms.

9. The introduction of this manuscript is too simple.  
=> We added several sequencing platform comparative studies to the introduction section.

Minor revisions:

1. The coverages of BGISEQ-500 and HiSeqX10 were not mentioned in the first section.  
=> We added the coverages of BGISEQ-500 and HiSeqX10 in the first section.

2. Using the ratio of singletons may help you to bring out your findings more clearly.  
=> We agree with the reviewer's comment. We examined the concordance rate of the singleton variants with SNP genotyping (see below). However, it was difficult to obtain statistically significant results because there were very few overlapping positions.

<https://github.com/howmany2/SequencingPlatformComparison/raw/master/Comparison%20between%20singleton%20variants>

Reviewer #2: The submitted study has characterized sequencing quality, uniformity of coverage, %GC coverage, and variant calling. The study showed a higher concordance rate of SNP genotyping than HiSeq series. The study is of interest to genomics and sequencing technology acceptance.

=> Thank you for the feedback. We have modified the text and added further analysis to accommodate the reviewer's suggestions.

1) The author defined low-quality reads as those that had more than 30% of bases with a sequencing quality score lower than 30. Did you change this definition?

=> As a supplementary analysis, we conducted an analysis without the filtering step to see how much the read filtering step affected the results. We conducted this analysis by matching the number of unfiltered reads with that of clean reads of prior analysis. The two tables below are the results for the cases using clean (filtered) and unfiltered sequences (see link below).

<https://github.com/howmany2/SequencingPlatformComparison/raw/master/Mapping%20rate%20and%20Variant%20statistics>

As a result of using the unfiltered sequences, there was no notable difference in mapping and duplicate rates. The number of SNVs increased, the hetero/homo ratio increased by 0.02 on average. Interestingly, the differences in total SNVs between the MGI and Illumina platforms were similar. In the case of the Illumina platforms, on average, 44,000 additional SNVs were discovered when using unfiltered reads. In the case of the MGI platform, an increment of 800 SNVs on average was observed when using unfiltered reads.

2) It looks like the author ignored that the highest duplicate ratio was found in MGISEQ-T7. More discussion and analysis should be provided. Contamination may be more affected by the process of sample preparation than by the sequencing instrument. However, the high duplicate ratio in MGISEQ-T7 is not due to contamination.  
=> We agree with the reviewer's concerns about the high duplicate ratio. We provide the table presenting the mapping rates with the KOREF sample. We found that the duplicate rates of other human samples that were sequenced simultaneously were also high. An FS library kit containing PCR steps was used for MGISEQ-T7 sequencing of the KOREF sample. Furthermore, according to the manufacturer's information, the high duplication rate, and the new PE150 (Paired-end 150 bp) protocol reduces the duplication rate to less than 3%. We used the PE150 protocol for the KOREF sample. The reason why relatively many duplicated reads were found from the reads generated by the MGISEQ-T7 platform. However, the results were analyzed after removing the duplicate reads and matching to the same genome coverage for the seven sequencing platforms.

<https://github.com/howmany2/SequencingPlatformComparison/raw/master/Mapping%20and%20duplicate%20rate%20of%20KOREF>

There are three main causes of duplicate reads generated by NGS technology.

1. Natural duplication
2. PCR duplicates (occur in library preparation step)
3. Optical duplicates (occur in sequencing step)

Natural duplications are not discussed in this section because it is difficult to distinguish them from PCR duplicates and optical duplicates.

optical duplication of the seven platforms (see link below).

<https://github.com/howmany2/SequencingPlatformComparison/raw/master/Statistics%20of%20PCR%20duplicate%20and%20optical%20duplication%20of%20the%20seven%20platforms>

This result showed that PCR duplication occurs at least 2 times more than the optical duplication. (Unfortunately, the two most duplication occurs during the library preparation rather than the sequencing steps.

The adapter contamination is caused by the sequencing of short DNA fragments that are shorter than the read length (Turner et al., 2014). We expected that adapter contamination is mainly affected by the library preparation step, because size selection of DNA fragments can introduce the shorter DNA fragments into the DNA library for sequencing.

Reviewer #3: The authors compare various short-insert, short-read whole-genome sequencing platforms used by academic researchers.

My minor comments and suggestions are:

- As stated by the authors, Illumina platforms are indeed now considered 'historical.' However, many Illumina sequencers are still in use and prove very useful when arguing for an instrument upgrade in such a setting.
- You may like to comment on single tube long fragment read (stLFR), which enables the sequencing of long transcripts but is probably also MGISEQ-T7 (10.1101/gr.245126.118). This technology is relatively cheap and is likely to decrease in cost -
- You may want to comment on Illumina library kits. It is possible that revisions [in the five-six years since the data in your paper (e.g., see 10.1371/journal.pone.0113501). I realize the effect may be minor, but it may nevertheless be useful to remind the authors. => Thank you for your positive feedback and the suggestions. We added the idea suggested in your comments to the discussion.

Close
